# Supplementary material
Source: PubMed Central journal article supplement (PMC3302495)
Supplement: supp_86.7.3995_TableS1-S5.pdf [file supp_86.7.3995_TableS1-S5.pdf]

**TABLE S1** Model selection results for the RdRp gene of coronaviruses through comparison of marginal likelihoods and  $\log_{10}$  Bayes factors for each pair of models

| Model combination <sup>a</sup> | Ln P (model/data) <sup>b</sup> | S.E. <sup>c</sup> | Model combination |            |          |          |
|--------------------------------|--------------------------------|-------------------|-------------------|------------|----------|----------|
|                                |                                |                   | Strict_CST        | Strict_BSP | Uclد_CST | Uclد_BSP |
| Strict_CST                     | -56035.764                     | +/- 0.098         | -                 | -0.161     | -19.808  | -19.824  |
| Strict_BSP                     | -56035.394                     | +/- 0.094         | 0.161             | -          | -19.648  | -19.664  |
| Uclد_CST                       | -55990.153                     | +/- 0.127         | 19.808            | 19.648     | -        | -0.016   |
| Uclد_BSP                       | -55990.117                     | +/- 0.125         | 19.824            | 19.664     | 0.016    | -        |

<sup>a</sup>Two molecular clock models, a strict clock and a relaxed clock assuming uncorrelated lognormal distribution (Uclد) of substitution rates, were compared in combination with models of demographic history, constant size (CST) and Bayesian skyline (BSP). The adopted model was highlighted.

<sup>b</sup>Marginal likelihood estimated using the program Tracer 1.5. A  $\log_{10}$  Bayes factor was calculated for each pair of model combinations (model 1 in row versus model 2 in column).

<sup>c</sup>Standard error for the marginal likelihood.

**TABLE S2** Bird species screened and associated CoVs in the present surveillance study

| Family                       | Scientific name                   | Common name                    | No. of bird specimens tested | No. (%) of birds positive for CoV | CoV          |   |
|------------------------------|-----------------------------------|--------------------------------|------------------------------|-----------------------------------|--------------|---|
| <i>Accipitridae</i>          | <i>Accipiter gentilis</i>         | Northern goshawk               | 1                            | 0(0)                              | -            |   |
|                              | <i>Accipiter gularis</i>          | Japanese sparrowhawk           | 1                            | 0(0)                              | -            |   |
|                              | <i>Accipiter virgatus</i>         | Besra                          | 2                            | 0(0)                              | -            |   |
|                              | <i>Accipiter soloensis</i>        | Chinese goshawk                | 2                            | 0(0)                              | -            |   |
|                              | <i>Accipiter trivirgatus</i>      | Crested goshawk                | 6                            | 0(0)                              | -            |   |
|                              | <i>Buteo buteo</i>                | Common buzzard                 | 4                            | 0(0)                              | -            |   |
|                              | <i>Milvus migrans</i>             | Black kite                     | 4                            | 0(0)                              | -            |   |
|                              | <i>Mirafra javanica</i>           | Eastern bushlark               | 1                            | 0(0)                              | -            |   |
|                              | <i>Alcedinidae</i>                | <i>Alcedo atthis</i>           | Common kingfisher            | 15                                | 0(0)         | - |
| <i>Anatidae</i>              | <i>Anas acuta</i>                 | Northern pintail               | 1                            | 0(0)                              | -            |   |
|                              | <i>Anas crecca</i>                | Common teal                    | 1                            | 0(0)                              | -            |   |
|                              | <i>Anas penelope</i>              | Eurasian wigeon                | 5                            | 1(20.0)                           | WiCoV HKU20  |   |
|                              | <i>Aythya fuligula</i>            | Tufted duck                    | 3                            | 0(0)                              | -            |   |
| <i>Apodidae</i>              | <i>Apus nipalensis</i>            | House swift                    | 18                           | 0(0)                              | -            |   |
| <i>Ardeidae</i>              | <i>Ardea alba</i>                 | Great egret                    | 2                            | 0(0)                              | -            |   |
|                              | <i>Ardeola bacchus</i>            | Chinese pond heron             | 16                           | 0(0)                              | -            |   |
|                              | <i>Ardea cinerea</i>              | Grey heron                     | 7                            | 0(0)                              | -            |   |
|                              | <i>Botaurus stellaris</i>         | Great bittern                  | 1                            | 0(0)                              | -            |   |
|                              | <i>Butorides striata</i>          | Striated heron                 | 1                            | 0(0)                              | -            |   |
|                              | <i>Egretta eulophotes</i>         | Swinhoe's egret                | 1                            | 0(0)                              | -            |   |
|                              | <i>Egretta garzetta</i>           | Little egret                   | 15                           | 0(0)                              | -            |   |
|                              | <i>Ixobrychus sinensis</i>        | Yellow bittern                 | 1                            | 0(0)                              | -            |   |
|                              | <i>Nycticorax nycticorax</i>      | Black-crowned night heron      | 15                           | 5(33.3)                           | NHCoV HKU19  |   |
|                              | <i>Cacatuidae</i>                 | <i>Cacatua sulphurea</i>       | Yellow-crested cockatoo      | 2                                 | 0(0)         | - |
|                              |                                   | <i>Nymphicus hollandicus</i>   | Cockatiel                    | 3                                 | 0(0)         | - |
| <i>Campephagidae</i>         | <i>Pericrocotus cantonensis</i>   | Swinhoe's minivet              | 1                            | 0(0)                              | -            |   |
|                              | <i>Pericrocotus flammeus</i>      | Scarlet minivet                | 1                            | 0(0)                              | -            |   |
| <i>Columbidae</i>            | <i>Chalcophaps indica</i>         | Emerald dove                   | 50                           | 0(0)                              | -            |   |
|                              | <i>Columba livia domestica</i>    | Feral pigeon                   | 285                          | 0(0)                              | -            |   |
|                              | <i>Streptopelia chinensis</i>     | Spotted dove                   | 956                          | 0(0)                              | -            |   |
|                              | <i>Streptopelia orientalis</i>    | Oriental turtle dove           | 4                            | 0(0)                              | -            |   |
|                              | <i>Streptopelia tranquebarica</i> | Red turtle dove                | 23                           | 0(0)                              | -            |   |
| <i>Corvidae</i>              | <i>Corvus torquatus</i>           | Collared crow                  | 2                            | 0(0)                              | -            |   |
|                              | <i>Corvus splendens</i>           | House crow                     | 50                           | 0(0)                              | -            |   |
|                              | <i>Pica pica</i>                  | Common magpie                  | 4                            | 0(0)                              | -            |   |
|                              | <i>Urocissa erythrorhyncha</i>    | Blue magpie                    | 2                            | 0(0)                              | -            |   |
|                              | <i>Cuculidae</i>                  | <i>Cacomantis merulinus</i>    | Plaintive cuckoo             | 7                                 | 0(0)         | - |
| <i>Centropus bengalensis</i> |                                   | Lesser coucal                  | 5                            | 0(0)                              | -            |   |
| <i>Centropus sinensis</i>    |                                   | Greater coucal                 | 6                            | 0(0)                              | -            |   |
| <i>Clamator coromandus</i>   |                                   | Chestnut-winged cuckoo         | 2                            | 0(0)                              | -            |   |
| <i>Cuculus canorus</i>       |                                   | Common cuckoo                  | 2                            | 0(0)                              | -            |   |
| <i>Cuculus sparverioides</i> |                                   | Large hawk cuckoo              | 2                            | 0(0)                              | -            |   |
| <i>Cuculus saturatus</i>     |                                   | Oriental cuckoo                | 10                           | 0(0)                              | -            |   |
| <i>Eudynamys scolopacea</i>  |                                   | Common koel                    | 20                           | 0(0)                              | -            |   |
| <i>Dicaeidae</i>             | <i>Dicaeum cruentatum</i>         | Scarlet-backed flowerpecker    | 1                            | 0(0)                              | -            |   |
| <i>Dicruridae</i>            | <i>Dicrurus aeneus</i>            | Bronzed drongo                 | 1                            | 0(0)                              | -            |   |
|                              | <i>Dicrurus annectans</i>         | Crow-billed drongo             | 1                            | 0(0)                              | -            |   |
|                              | <i>Dicrurus hottentottus</i>      | Hair-crested drongo            | 3                            | 0(0)                              | -            |   |
|                              | <i>Dicrurus macrocercus</i>       | Black drongo                   | 2                            | 0(0)                              | -            |   |
|                              | -                                 | <i>Terpsiphone atrocaudata</i> | Japanese paradise flycatcher | 30                                | 0(0)         | - |
| <i>Estrildidae</i>           | <i>Erythrura gouldiae</i>         | Gouldian finch                 | 1                            | 0(0)                              | -            |   |
|                              | <i>Lonchura atricapilla</i>       | Chestnut munia                 | 32                           | 1(3.1)                            | MunCoV HKU13 |   |
|                              | <i>Lonchura punctulata</i>        | Scaly-breasted munia           | 31                           | 0(0)                              | -            |   |
|                              | <i>Lonchura striata</i>           | White-rumped munia             | 100                          | 5(5.0)                            | MunCoV HKU13 |   |
| <i>Falconidae</i>            | <i>Falco peregrinus</i>           | Peregrine falcon               | 1                            | 0(0)                              | -            |   |
| <i>Fringillidae</i>          | <i>Serinus canaria</i>            | Canary                         | 2                            | 0(0)                              | -            |   |
|                              | <i>Serinus mozambicus</i>         | Yellow-fronted canary          | 1                            | 0(0)                              | -            |   |
| <i>Halcyonidae</i>           | <i>Halcyon pileata</i>            | Black-capped kingfisher        | 1                            | 0(0)                              | -            |   |
|                              | <i>Halcyon smyrnensis</i>         | White-throated kingfisher      | 2                            | 0(0)                              | -            |   |
| <i>Hirundinidae</i>          | <i>Hirundo rustica</i>            | Barn swallow                   | 8                            | 0(0)                              | -            |   |
| <i>Laniidae</i>              | <i>Lanius schach</i>              | Long-tailed shrike             | 6                            | 0(0)                              | -            |   |
| <i>Megalaimidae</i>          | <i>Megalaima oorti</i>            | Black-browed barbet            | 1                            | 0(0)                              | -            |   |

|                          |                                  |                            |     |        |             |
|--------------------------|----------------------------------|----------------------------|-----|--------|-------------|
| <i>Motacillidae</i>      | <i>Anthus richardi</i>           | Richard's pipit            | 1   | 0(0)   | -           |
|                          | <i>Motacilla alba</i>            | White wagtail              | 2   | 0(0)   | -           |
| <i>Muscicapidae</i>      | <i>Copsychus saularis</i>        | Oriental magpie robin      | 108 | 1(0.9) | MRCoV HKU18 |
|                          | <i>Ficedula mugimaki</i>         | Mugimaki flycatcher        | 1   | 0(0)   | -           |
|                          | <i>Ficedula parva</i>            | Red-breasted flycatcher    | 2   | 0(0)   | -           |
|                          | <i>Luscinia calliope</i>         | Siberian rubythroat        | 2   | 0(0)   | -           |
|                          | <i>Niltava macgrigoriae</i>      | Small niltava              | 1   | 0(0)   | -           |
|                          | <i>Oenanthe pleschanka</i>       | Pied wheatear              | 1   | 0(0)   | -           |
|                          | <i>Phoenicurus aureoreus</i>     | Duarian redstart           | 1   | 0(0)   | -           |
|                          | <i>Rhyacornis fuliginosa</i>     | Plumbeous redstart         | 1   | 0(0)   | -           |
| <i>Nectariniidae</i>     | <i>Aethopyga christinae</i>      | Fork-tailed sunbird        | 3   | 0(0)   | -           |
|                          | <i>Nectarinia jugularis</i>      | Olive-backed sunbird       | 7   | 0(0)   | -           |
| <i>Paridae</i>           | <i>Parus major</i>               | Great tit                  | 2   | 0(0)   | -           |
|                          | <i>Parus monticolus</i>          | Green-backed tit           | 1   | 0(0)   | -           |
| <i>Passeridae</i>        | <i>Passer montanus</i>           | Tree sparrow               | 335 | 7(2.1) | SpCoV HKU17 |
| <i>Phalacrocoracidae</i> | <i>Phalacrocorax carbo</i>       | Great cormorant            | 3   | 0(0)   | -           |
| <i>Phasianidae</i>       | <i>Bambusicola thoracicus</i>    | Chinese bamboo partidge    | 1   | 0(0)   | -           |
|                          | <i>Chrysolophus amherstiae</i>   | Lady amherst's pheasant    | 1   | 0(0)   | -           |
|                          | <i>Chrysolophus pictus</i>       | Golden pheasant            | 3   | 0(0)   | -           |
|                          | <i>Coturnix japonica</i>         | Japanese quail             | 9   | 0(0)   | -           |
|                          | <i>Gallus gallus</i>             | Chicken                    | 2   | 0(0)   | -           |
|                          | <i>Phasianus colchicus</i>       | Common pheasant            | 6   | 0(0)   | -           |
|                          | <i>Symaticus reevesii</i>        | Reeves's pheasant          | 1   | 0(0)   | -           |
|                          | <i>Tragopan caboti</i>           | Cabot's tragopan           | 1   | 0(0)   | -           |
| <i>Phylloscopidae</i>    | <i>Phylloscopus fuscatus</i>     | Dusky warbler              | 75  | 0(0)   | -           |
| <i>Podicipedidae</i>     | <i>Tachybaptus ruficollis</i>    | Little grebe               | 1   | 0(0)   | -           |
| <i>Psittacidae</i>       | <i>Agapornis fischeri</i>        | Fischer's lovebird         | 4   | 0(0)   | -           |
|                          | <i>Melopsittacus undulatus</i>   | Budgerigar                 | 5   | 0(0)   | -           |
|                          | <i>Psittacula alexandri</i>      | Red-breasted parakeet      | 1   | 0(0)   | -           |
|                          | <i>Psittacus erithacus</i>       | African grey parrot        | 2   | 0(0)   | -           |
| <i>Pycnonotidae</i>      | <i>Hemixos castanonotus</i>      | Chestnut bulbul            | 16  | 0(0)   | -           |
|                          | <i>Pycnonotus aurigaster</i>     | Sooty-headed bulbul        | 111 | 5(4.5) | BuCoV HKU11 |
|                          | <i>Pycnonotus jocosus</i>        | Red-whiskered bulbul       | 112 | 2(1.8) | BuCoV HKU11 |
|                          | <i>Pycnonotus sinensis</i>       | Chinese bulbul             | 132 | 3(2.3) | BuCoV HKU11 |
| <i>Rallidae</i>          | <i>Amaurornis phoenicurus</i>    | White-breasted waterhen    | 23  | 0(0)   | -           |
|                          | <i>Gallinula chloropus</i>       | Common moorhen             | 13  | 1(7.7) | CMCoV HKU21 |
|                          | <i>Gallirallus striatus</i>      | Slaty-breasted rail        | 6   | 0(0)   | -           |
|                          | <i>Porzana fusca</i>             | Ruddy-breasted crane       | 8   | 0(0)   | -           |
|                          | <i>Porzana paykullii</i>         | Band-bellied crane         | 2   | 0(0)   | -           |
|                          | <i>Rallus aquaticus</i>          | Water rail                 | 2   | 0(0)   | -           |
|                          | <i>Rallina eurizonoides</i>      | Slaty-legged crane         | 1   | 0(0)   | -           |
| <i>Scolopacidae</i>      | <i>Calidris ferruginea</i>       | Curlew sandpiper           | 1   | 0(0)   | -           |
|                          | <i>Lymnocyrtus minimus</i>       | Jack snipe                 | 1   | 0(0)   | -           |
|                          | <i>Scolopax rusticola</i>        | Eurasian woodcock          | 10  | 0(0)   | -           |
| <i>Strigidae</i>         | <i>Bubo bubo</i>                 | Eurasian eagle owl         | 1   | 0(0)   | -           |
|                          | <i>Glaucidium brodiei</i>        | Collared owl               | 2   | 0(0)   | -           |
|                          | <i>Glaucidium cuculoides</i>     | Asian barred owl           | 1   | 0(0)   | -           |
|                          | <i>Ninox scutulata</i>           | Brown hawk owl             | 3   | 0(0)   | -           |
| <i>Sturnidae</i>         | <i>Acridotheres cristatellus</i> | Crested myna               | 20  | 0(0)   | -           |
|                          | <i>Acridotheres tristis</i>      | Common myna                | 2   | 0(0)   | -           |
|                          | <i>Gracula religiosa</i>         | Hill myna                  | 4   | 0(0)   | -           |
|                          | <i>Sturnus contra</i>            | Asian pied starling        | 1   | 0(0)   | -           |
|                          | <i>Sturnus nigricollis</i>       | Black-collared starling    | 33  | 0(0)   | -           |
|                          | <i>Sturnus philippensis</i>      | Chestnut-cheeked starling  | 3   | 0(0)   | -           |
|                          | <i>Sturnus sericeus</i>          | Red-billed starling        | 19  | 0(0)   | -           |
| <i>Timaliidae</i>        | <i>Garrulax affinis</i>          | Black-faced laughingthrush | 1   | 0(0)   | -           |
|                          | <i>Garrulax canorus</i>          | Hwamei                     | 14  | 0(0)   | -           |
|                          | <i>Garrulax maesi</i>            | Grey laughingthrush        | 1   | 0(0)   | -           |
|                          | <i>Garrulax perspicillatus</i>   | Masked laughingthrush      | 12  | 0(0)   | -           |
|                          | <i>Leiothrix argentea</i>        | Silver-eared mesia         | 3   | 0(0)   | -           |
|                          | <i>Leiothrix lutea</i>           | Red-billed leiothrix       | 3   | 0(0)   | -           |
| <i>Turdidae</i>          | <i>Myiophonus caeruleus</i>      | Blue-whistling thrush      | 14  | 0(0)   | -           |
|                          | <i>Turdus cardis</i>             | Japanese thrush            | 19  | 0(0)   | -           |
|                          | <i>Turdus chrysolaus</i>         | Brown-headed thrush        | 1   | 0(0)   | -           |
|                          | <i>Turdus hortulorum</i>         | Grey-backed thrush         | 136 | 1(0.7) | ThCoV HKU12 |
|                          | <i>Turdus merula</i>             | Blackbird                  | 41  | 0(0)   | -           |
|                          | <i>Turdus pallidus</i>           | Pale thrush                | 8   | 0(0)   | -           |
|                          | <i>Turdus rubrocanus</i>         | Chestnut thrush            | 1   | 0(0)   | -           |
|                          | <i>Zoothera citrina</i>          | Orange-headed thrush       | 4   | 0(0)   | -           |

|                     |                            |                    |     |        |             |
|---------------------|----------------------------|--------------------|-----|--------|-------------|
| <i>Turnicidae</i>   | <i>Zoothera dauma</i>      | Scaly thrush       | 8   | 0(0)   | -           |
|                     | <i>Turnix sylvatica</i>    | Small button quail | 3   | 0(0)   | -           |
| <i>Zosteropidae</i> | <i>Zosterops japonicus</i> | Japanese white eye | 143 | 3(2.1) | WECov HKU16 |

---

**TABLE S3** Putative cleavage sites at the junctions between non-structural proteins in the genomes of PorCoV HKU15, WECov HKU16, SpCoV HKU17, MRCoV HKU18, NHCov HKU19, WiCoV HKU20, and CMCoV HKU21

| nsp         | Putative cleavage site |                |                |                |                |                |                |
|-------------|------------------------|----------------|----------------|----------------|----------------|----------------|----------------|
|             | PorCoV<br>HKU15        | WECov<br>HKU16 | SpCoV<br>HKU17 | MRCoV<br>HKU18 | NHCov<br>HKU19 | WiCoV<br>HKU20 | CMCoV<br>HKU21 |
| nsp2/nsp3   | AG/SD                  | AG/SD          | AG/SD          | AG/AD          | VG/GL          | DG/VY          | AG/VS          |
| nsp3/nsp4   | AG/AP                  | AG/AR          | AG/AP          | AG/AM          | TG/GN          | GG/SK          | AG/KF          |
| nsp4/nsp5   | LQ/AG                  | LQ/AG          | LQ/AG          | LQ/AG          | VQ/AG          | VQ/SG          | LQ/AG          |
| nsp5/nsp6   | LQ/SG                  | LQ/SN          | LQ/SG          | LQ/SG          | LQ/GT          | LQ/AN          | LQ/AS          |
| nsp6/nsp7   | VQ/NK                  | VQ/NK          | VQ/NK          | VQ/NK          | VQ/NK          | VQ/NR          | VQ/NR          |
| nsp7/nsp8   | VQ/AV                  | LQ/AV          | VQ/AV          | VQ/AV          | LQ/VV          | LQ/VV          | LQ/AV          |
| nsp8/nsp9   | LQ/NN                  | IQ/NN          | LQ/NN          | LQ/NN          | LQ/NN          | CQ/NN          | IQ/NN          |
| nsp9/nsp10  | LQ/AS                  | LQ/AN          | LQ/AN          | LQ/AN          | LQ/SS          | LQ/AN          | LQ/AT          |
| nsp10/nsp11 | LQ/NS                  | LQ/GS          | LQ/NS          | LQ/NS          | LQ/LG          | LQ/SN          | LQ/NT          |
| nsp12/nsp13 | LQ/AS                  | LQ/AS          | LQ/AS          | LQ/AS          | LQ/AT          | LQ/AT          | LQ/AS          |
| nsp13/nsp14 | LQ/SS                  | LQ/SS          | LQ/SS          | LQ/AG          | VQ/SL          | VQ/AE          | VQ/CS          |
| nsp14/nsp15 | LQ/NL                  | LQ/NL          | LQ/NL          | LQ/NL          | LQ/TL          | LQ/TL          | LQ/TI          |
| nsp15/nsp16 | LQ/SL                  | VQ/SL          | LQ/SL          | LQ/SL          | VQ/AL          | LQ/SL          | VQ/SL          |

**TABLE S4** Putative accessory proteins downstream to N gene predicted to contain transmembrane helices by TMHMM and TMpred in the genomes of SpCoV HKU17, MRCoV HKU18, NHCov HKU19, WiCoV HKU20 and CMCoV HKU21

| CoV         | Protein | Location of transmembrane helix predicted by TMHMM | Location of transmembrane helix predicted by TMpred |
|-------------|---------|----------------------------------------------------|-----------------------------------------------------|
| SpCoV HKU17 | NS7b    | 1 to 22 and 27 to 49                               | 1 to 22 and 31 to 49                                |
| MRCoV HKU18 | NS7c    | 43 to 65                                           | 41 to 65                                            |
| NHCov HKU19 | NS7b    | 23 to 45                                           | 26 to 42                                            |
| WiCoV HKU20 | NS7d    | 35 to 54                                           | 37 to 53                                            |
|             | NS7c    | 22 to 44 and 65 to 87                              | 24 to 41 and 67 to 87                               |
| CMCoV HKU21 | NS7a    | 42 to 64                                           | 45 to 65                                            |

**TABLE S5** Comparison of amino acid identities of the seven conserved replicase domains for species demarcation [ADRP, nsp5 (3CL<sup>pro</sup>), nsp12 (RdRp), nsp13 (Hel), nsp14 (ExoN), nsp15 (NendoU) and nsp16 (O-MT)] among the 10 deltacoronaviruses

| CoV             | Domains            | BuCoV<br>HKU11 | ThCoV<br>HKU12 | MunCoV<br>HKU13 | PorCoV<br>HKU15 | WECov<br>HKU16 | SpCoV<br>HKU17 | MRCov<br>HKU18 | NHCov<br>HKU19 | WiCoV<br>HKU20 | CMCoV<br>HKU21 |
|-----------------|--------------------|----------------|----------------|-----------------|-----------------|----------------|----------------|----------------|----------------|----------------|----------------|
| BuCoV<br>HKU11  | ADRP               | -              | 90             | 75              | 73              | 79             | 72             | 74             | 61.9           | 67             | 61             |
|                 | 3CL <sup>pro</sup> | -              | 87.6           | 79.2            | 81.1            | 82.4           | 80.8           | 79.5           | 57             | 58.3           | 77.5           |
|                 | RdRp               | -              | 92.4           | 88.2            | 88.2            | 90.9           | 88.2           | 88.3           | 72.3           | 70.8           | 84.8           |
|                 | Hel                | -              | 96.5           | 90              | 89.4            | 96             | 89.6           | 90.4           | 76.8           | 75.4           | 91             |
|                 | ExoN               | -              | 96.5           | 90              | 89.4            | 96             | 89.6           | 90.4           | 76.8           | 75.4           | 91             |
|                 | NendoU             | -              | 89.3           | 76.6            | 80.1            | 80.7           | 80.4           | 79.2           | 55.3           | 50.9           | 69.4           |
|                 | O-MT               | -              | 88.2           | 86              | 86.4            | 88.2           | 86.4           | 87.1           | 66.8           | 67             | 81.4           |
| ThCoV<br>HKU12  | ADRP               | -              | 72             | 77              | 82              | 76             | 75             | 59             | 67             | 57.1           |                |
|                 | 3CL <sup>pro</sup> | -              | 80.5           | 82.1            | 83.1            | 81.8           | 81.4           | 57.3           | 57.7           | 78.2           |                |
|                 | RdRp               | -              | 86.9           | 88.2            | 89.5            | 88.2           | 86.8           | 71.9           | 71.3           | 84.4           |                |
|                 | Hel                | -              | 89.6           | 89.7            | 94.7            | 89.9           | 89.9           | 76.4           | 74.5           | 90.5           |                |
|                 | ExoN               | -              | 89.6           | 89.7            | 94.7            | 89.9           | 89.9           | 76.4           | 74.5           | 90.5           |                |
|                 | NendoU             | -              | 77.2           | 79.2            | 81.3            | 80.7           | 79.2           | 55.6           | 50.3           | 69.7           |                |
|                 | O-MT               | -              | 84.9           | 86.4            | 85.3            | 86.7           | 84.2           | 66.1           | 66.3           | 79.6           |                |
| MunCoV<br>HKU13 | ADRP               | -              | 82             | 82              | 76              | 83             | 89             | 62.9           | 75             | 61             |                |
|                 | 3CL <sup>pro</sup> | -              | 82.7           | 76.5            | 82.7            | 76.5           | 83.4           | 94.5           | 53.1           | 55.4           | 72             |
|                 | RdRp               | -              | 90.1           | 87.9            | 90.1            | 94.6           | 72.9           | 71.7           | 84.7           |                |                |
|                 | Hel                | -              | 95.8           | 89.1            | 96              | 98             | 78             | 75.7           | 85.4           |                |                |
|                 | ExoN               | -              | 95.8           | 89.1            | 96              | 98             | 78             | 75.7           | 85.4           |                |                |
|                 | NendoU             | -              | 81.5           | 74.2            | 83              | 88.1           | 57.9           | 50.3           | 72             |                |                |
|                 | O-MT               | -              | 91             | 83.9            | 91              | 91.8           | 64.6           | 62.4           | 82.1           |                |                |
| PorCoV<br>HKU15 | ADRP               | -              | 80             | 97              | 81              | 61             | 74             | 61             |                |                |                |
|                 | 3CL <sup>pro</sup> | -              | 76.9           | 97              | 84.3            | 54             | 57.7           | 73.6           |                |                |                |
|                 | RdRp               | -              | 88.1           | 97.8            | 90.6            | 72.5           | 71             | 84.5           |                |                |                |
|                 | Hel                | -              | 88.4           | 99.2            | 96.1            | 78.2           | 74.9           | 84.6           |                |                |                |
|                 | ExoN               | -              | 88.4           | 99.2            | 96.1            | 78.2           | 74.9           | 84.6           |                |                |                |
|                 | NendoU             | -              | 76.5           | 96              | 83.5            | 58.7           | 50.5           | 70.6           |                |                |                |
|                 | O-MT               | -              | 84.6           | 96.8            | 89.2            | 65.7           | 63.4           | 82.8           |                |                |                |
| WECov<br>HKU16  | ADRP               | -              | 80             | 76              | 60              | 70             | 61             |                |                |                |                |
|                 | 3CL <sup>pro</sup> | -              | 77.2           | 77.2            | 55              | 59.6           | 76.9           |                |                |                |                |
|                 | RdRp               | -              | 88.3           | 87.3            | 71.7            | 71.5           | 84.8           |                |                |                |                |
|                 | Hel                | -              | 88.6           | 89.1            | 76.6            | 74.3           | 90.5           |                |                |                |                |
|                 | ExoN               | -              | 88.6           | 89.1            | 76.6            | 74.3           | 90.5           |                |                |                |                |
|                 | NendoU             | -              | 75.5           | 75.8            | 53.8            | 50.9           | 65.1           |                |                |                |                |
|                 | O-MT               | -              | 84.9           | 84.6            | 63.6            | 63.4           | 80.3           |                |                |                |                |
| SpCoV<br>HKU17  | ADRP               | -              | 81             | 61              | 75              | 61             |                |                |                |                |                |
|                 | 3CL <sup>pro</sup> | -              | 84.9           | 52.8            | 58              | 73             |                |                |                |                |                |
|                 | RdRp               | -              | 91             | 72.3            | 71              | 84.7           |                |                |                |                |                |
|                 | Hel                | -              | 96.3           | 78.4            | 75.1            | 84.9           |                |                |                |                |                |
|                 | ExoN               | -              | 96.3           | 78.4            | 75.1            | 84.9           |                |                |                |                |                |
|                 | NendoU             | -              | 84.1           | 58.4            | 51.1            | 71.6           |                |                |                |                |                |
|                 | O-MT               | -              | 89.6           | 65              | 64.2            | 82.4           |                |                |                |                |                |
| MRCov<br>HKU18  | ADRP               | -              | 60             | 72              | 59              |                |                |                |                |                |                |
|                 | 3CL <sup>pro</sup> | -              | 54             | 56.4            | 73.3            |                |                |                |                |                |                |
|                 | RdRp               | -              | 72.5           | 71.2            | 85.1            |                |                |                |                |                |                |
|                 | Hel                | -              | 77.7           | 75.1            | 84.8            |                |                |                |                |                |                |
|                 | ExoN               | -              | 77.7           | 75.1            | 84.8            |                |                |                |                |                |                |
|                 | NendoU             | -              | 58.2           | 50.5            | 73.4            |                |                |                |                |                |                |
|                 | O-MT               | -              | 64.3           | 63.4            | 83.2            |                |                |                |                |                |                |
| NHCov<br>HKU19  | ADRP               | -              | 57.1           | 60              |                 |                |                |                |                |                |                |
|                 | 3CL <sup>pro</sup> | -              | 58.3           | 55.5            |                 |                |                |                |                |                |                |
|                 | RdRp               | -              | 69.3           | 71.9            |                 |                |                |                |                |                |                |
|                 | Hel                | -              | 75.4           | 77.6            |                 |                |                |                |                |                |                |
|                 | ExoN               | -              | 75.4           | 77.6            |                 |                |                |                |                |                |                |
|                 | NendoU             | -              | 53.5           | 55              |                 |                |                |                |                |                |                |
|                 | O-MT               | -              | 61.6           | 66.1            |                 |                |                |                |                |                |                |
| WiCoV<br>HKU20  | ADRP               | -              | 57.1           |                 |                 |                |                |                |                |                |                |
|                 | 3CL <sup>pro</sup> | -              | 58.3           |                 |                 |                |                |                |                |                |                |
|                 | RdRp               | -              | 70.8           |                 |                 |                |                |                |                |                |                |
|                 | Hel                | -              | 76.4           |                 |                 |                |                |                |                |                |                |
|                 | ExoN               | -              | 76.4           |                 |                 |                |                |                |                |                |                |
|                 | NendoU             | -              | 48.9           |                 |                 |                |                |                |                |                |                |
|                 | O-MT               | -              | 64.5           |                 |                 |                |                |                |                |                |                |
| CMCoV<br>HKU21  | ADRP               | -              |                |                 |                 |                |                |                |                |                |                |
|                 | 3CL <sup>pro</sup> | -              |                |                 |                 |                |                |                |                |                |                |
|                 | RdRp               | -              |                |                 |                 |                |                |                |                |                |                |
|                 | Hel                | -              |                |                 |                 |                |                |                |                |                |                |
|                 | ExoN               | -              |                |                 |                 |                |                |                |                |                |                |
|                 | NendoU             | -              |                |                 |                 |                |                |                |                |                |                |
|                 | O-MT               | -              |                |                 |                 |                |                |                |                |                |                |

Amino acid sequences share more than 90% identity are highlighted in gray
